# Supplementary material for: The Relationship between Social Support for Physical Activity and Physical Activity across Nine Years in Adults Aged 60–65 Years at Baseline
Source: MDPI journal article supplement (doi:10.3390/ijerph20054531), 2023-03-03
Supplement: s1 [file s1]

## Supplementary materials

**Table S1.** Akaike Information Criterion (AIC) values for linear mixed model build

| Model | Fixed effects                                                                                               | Random Effect | AIC   |
|-------|-------------------------------------------------------------------------------------------------------------|---------------|-------|
| 1     | SSPA <sup>1</sup>                                                                                           | participant   | 74506 |
| 2     | SSPA <sup>1</sup> + wave                                                                                    | participant   | 74369 |
| 3     | SSPA <sup>1</sup> + wave + SSPA*wave                                                                        | participant   | 74365 |
| 4     | SSPA <sup>1</sup> + wave + SSPA*wave + gender                                                               | participant   | 74534 |
| 5     | SSPA <sup>1</sup> + wave + SSPA*wave + gender + education                                                   | participant   | 74330 |
| 6     | SSPA <sup>1</sup> + wave + SSPA*wave + gender + education + employment                                      | participant   | 74303 |
| 7     | SSPA <sup>1</sup> + wave + SSPA*wave + gender + education + employment + health rating                      | participant   | 74123 |
| 8     | SSPA <sup>1</sup> + wave + SSPA*wave + gender + education + employment + health rating + living arrangement | participant   | 74113 |

Note: A lower AIC value indicates better quality of fit relative to the complexity of the model; therefore, the model with the lowest AIC was selected.

<sup>1</sup>SSPA = Social support for Physical Activity
